# Supplementary material
Source: Springer Nature journal article supplement (https://www.springermedizin.de/resource/supplementary/13030_2014_151_MOESM2_ESM.pdf/9644852)

## Perception of relationships: This person...

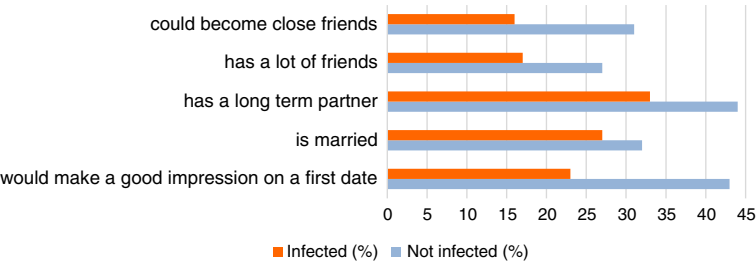

Supplement: MOESM2 [file 9644852]
